# Supplementary material
Source: MDPI journal article supplement (https://www.mdpi.com/2076-3417/10/20/7226)
Supplement: s1 [file s1]

|                                                                                                                                                                                                                                                                                                                                                                                                                                                                              |
|------------------------------------------------------------------------------------------------------------------------------------------------------------------------------------------------------------------------------------------------------------------------------------------------------------------------------------------------------------------------------------------------------------------------------------------------------------------------------|
| Professionals                                                                                                                                                                                                                                                                                                                                                                                                                                                                |
| Science and engineering professionals                                                                                                                                                                                                                                                                                                                                                                                                                                        |
| Food processing and related trades workers                                                                                                                                                                                                                                                                                                                                                                                                                                   |
| Engineering professionals (excluding electrotechnology)                                                                                                                                                                                                                                                                                                                                                                                                                      |
| Professional Job profile: civil engineer                                                                                                                                                                                                                                                                                                                                                                                                                                     |
| ESCO link: <a href="http://data.europa.eu/esco/occupation/d7d986e1-7333-431b-9719-0c5c6939e360">http://data.europa.eu/esco/occupation/d7d986e1-7333-431b-9719-0c5c6939e360</a>                                                                                                                                                                                                                                                                                               |
| Alternative labels: director of infrastructure projects, civil engineering consultant, civil engineering expert, infrastructure project manager, investments civil engineer, quality assurance civil engineer, civil engineering specialist, harbour civil engineer, civil engineering adviser                                                                                                                                                                               |
| Civil engineers design, plan, and develop technical and engineering specifications for infrastructure and construction projects. They apply engineering knowledge in a vast array of projects, from the construction of infrastructure for transportation, housing projects, and luxury buildings, to the construction of natural sites. They design plans that seek to optimise materials and integrate specifications and resource allocation within the time constraints. |
| ISCO number: 2142                                                                                                                                                                                                                                                                                                                                                                                                                                                            |
| Essential                                                                                                                                                                                                                                                                                                                                                                                                                                                                    |
| knowledge                                                                                                                                                                                                                                                                                                                                                                                                                                                                    |
| civil engineering                                                                                                                                                                                                                                                                                                                                                                                                                                                            |
| engineering principles                                                                                                                                                                                                                                                                                                                                                                                                                                                       |
| engineering processes                                                                                                                                                                                                                                                                                                                                                                                                                                                        |
| mining, construction and civil engineering machinery products                                                                                                                                                                                                                                                                                                                                                                                                                |
| technical drawings                                                                                                                                                                                                                                                                                                                                                                                                                                                           |
| skill/competence                                                                                                                                                                                                                                                                                                                                                                                                                                                             |
| adjust engineering designs                                                                                                                                                                                                                                                                                                                                                                                                                                                   |
| approve engineering design                                                                                                                                                                                                                                                                                                                                                                                                                                                   |
| ensure compliance with safety legislation                                                                                                                                                                                                                                                                                                                                                                                                                                    |
| perform scientific research                                                                                                                                                                                                                                                                                                                                                                                                                                                  |
| use technical drawing software                                                                                                                                                                                                                                                                                                                                                                                                                                               |
| Optional                                                                                                                                                                                                                                                                                                                                                                                                                                                                     |
| knowledge                                                                                                                                                                                                                                                                                                                                                                                                                                                                    |
| aerodynamics                                                                                                                                                                                                                                                                                                                                                                                                                                                                 |
| air traffic management                                                                                                                                                                                                                                                                                                                                                                                                                                                       |
| automation technology                                                                                                                                                                                                                                                                                                                                                                                                                                                        |
| biology                                                                                                                                                                                                                                                                                                                                                                                                                                                                      |
| business management principles                                                                                                                                                                                                                                                                                                                                                                                                                                               |
| cartography                                                                                                                                                                                                                                                                                                                                                                                                                                                                  |
| chemistry                                                                                                                                                                                                                                                                                                                                                                                                                                                                    |
| chemistry of wood                                                                                                                                                                                                                                                                                                                                                                                                                                                            |
| construction methods                                                                                                                                                                                                                                                                                                                                                                                                                                                         |
| construction products                                                                                                                                                                                                                                                                                                                                                                                                                                                        |
| consumer protection                                                                                                                                                                                                                                                                                                                                                                                                                                                          |
| contamination exposure regulations                                                                                                                                                                                                                                                                                                                                                                                                                                           |
| cost management                                                                                                                                                                                                                                                                                                                                                                                                                                                              |
| demolition techniques                                                                                                                                                                                                                                                                                                                                                                                                                                                        |
| design principles                                                                                                                                                                                                                                                                                                                                                                                                                                                            |
| electric generators                                                                                                                                                                                                                                                                                                                                                                                                                                                          |
| electrical discharge                                                                                                                                                                                                                                                                                                                                                                                                                                                         |

|                                                         |
|---------------------------------------------------------|
| electrical engineering                                  |
| electrical power safety regulations                     |
| electricity consumption                                 |
| energy efficiency                                       |
| energy market                                           |
| energy performance of buildings                         |
| environmental engineering                               |
| environmental legislation                               |
| environmental legislation in agriculture and forestry   |
| environmental policy                                    |
| fluid mechanics                                         |
| geochemistry                                            |
| geodesy                                                 |
| geographic information systems                          |
| geography                                               |
| geological time scale                                   |
| geology                                                 |
| geomatics                                               |
| geophysics                                              |
| green logistics                                         |
| hazardous waste storage                                 |
| hazardous waste treatment                               |
| hazardous waste types                                   |
| impact of geological factors on mining operations       |
| impact of meteorological phenomena on mining operations |
| industrial heating systems                              |
| logistics                                               |
| manufacturing processes                                 |
| mathematics                                             |
| mechanical engineering                                  |
| mechanics                                               |
| meteorology                                             |
| metrology                                               |
| multimodal transport logistics                          |
| non-destructive testing                                 |
| nuclear energy                                          |
| nuclear reprocessing                                    |
| paper chemistry                                         |
| paper production processes                              |
| photogrammetry                                          |
| pollution legislation                                   |
| pollution prevention                                    |
| power electronics                                       |
| power engineering                                       |
| project management                                      |

|                                          |
|------------------------------------------|
| public health                            |
| radiation protection                     |
| radioactive contamination                |
| regulations on substances                |
| renewable energy technologies            |
| safety engineering                       |
| sales strategies                         |
| soil science                             |
| solar energy                             |
| surveying                                |
| surveying methods                        |
| thermodynamics                           |
| timber products                          |
| topography                               |
| traffic engineering                      |
| transportation engineering               |
| transportation methods                   |
| types of pulp                            |
| types of wind turbines                   |
| types of wood                            |
| types of wood materials                  |
| urban planning                           |
| urban planning law                       |
| wildlife projects                        |
| wood cuts                                |
| wood moisture content                    |
| wood products                            |
| woodworking processes                    |
| zero-energy building design              |
| zoning codes                             |
| skill/competence                         |
| abide by regulations on banned materials |
| adapt energy distribution schedules      |
| address problems critically              |
| address public health issues             |
| adjust surveying equipment               |
| advise architects                        |
| advise customers on wood products        |
| advise on building matters               |
| advise on construction materials         |
| advise on environmental remediation      |
| advise on geology for mineral extraction |
| advise on mining environmental issues    |
| advise on pollution prevention           |
| advise on use of land                    |
| advise on waste management procedures    |

|                                                   |
|---------------------------------------------------|
| analyse energy consumption                        |
| analyse environmental data                        |
| analyse road traffic patterns                     |
| analyse transport studies                         |
| apply digital mapping                             |
| apply health and safety standards                 |
| apply safety management                           |
| assemble electrical components                    |
| assess environmental impact                       |
| assess financial viability                        |
| assess project resource needs                     |
| assess the life cycle of resources                |
| calculate exposure to radiation                   |
| calibrate electronic instruments                  |
| calibrate precision instrument                    |
| carry out energy management of facilities         |
| carry out environmental audits                    |
| carry out statistical forecasts                   |
| check durability of wood materials                |
| check quality of raw materials                    |
| collect data using GPS                            |
| collect geological data                           |
| collect mapping data                              |
| collect samples for analysis                      |
| communicate on minerals issues                    |
| communicate on the environmental impact of mining |
| compare survey computations                       |
| compile GIS-data                                  |
| conduct environmental surveys                     |
| conduct field work                                |
| conduct land surveys                              |
| conduct quality control analysis                  |
| conduct research before survey                    |
| coordinate electricity generation                 |
| create AutoCAD drawings                           |
| create GIS reports                                |
| create cadastral maps                             |
| create thematic maps                              |
| demolish selectively                              |
| demolish structures                               |
| design automation components                      |
| design scientific equipment                       |
| design strategies for nuclear emergencies         |
| design transportation systems                     |
| design wind farm collector systems                |

|                                                         |
|---------------------------------------------------------|
| design wind turbines                                    |
| determine boundaries                                    |
| develop efficiency plans for logistics operations       |
| develop environmental policy                            |
| develop environmental remediation strategies            |
| develop geological databases                            |
| develop hazardous waste management strategies           |
| develop material testing procedures                     |
| develop mine rehabilitation plan                        |
| develop non-hazardous waste management strategies       |
| develop radiation protection strategies                 |
| develop strategies for electricity contingencies        |
| develop test procedures                                 |
| distinguish wood quality                                |
| document survey operations                              |
| draft design specifications                             |
| draw blueprints                                         |
| ensure compliance with environmental legislation        |
| ensure compliance with radiation protection regulations |
| ensure equipment cooling                                |
| ensure material compliance                              |
| examine engineering principles                          |
| examine geochemical samples                             |
| execute analytical mathematical calculations            |
| execute feasibility study                               |
| follow nuclear plant safety precautions                 |
| identify energy needs                                   |
| identify hazards in the workplace                       |
| inform on government funding                            |
| inspect building systems                                |
| inspect compliance with hazardous waste regulations     |
| inspect construction supplies                           |
| inspect facility sites                                  |
| inspect industrial equipment                            |
| inspect wind turbines                                   |
| inspect wood materials                                  |
| interpret geophysical data                              |
| investigate contamination                               |
| maintain nuclear reactors                               |
| maintain photovoltaic systems                           |
| maintain records of mining operations                   |
| make electrical calculations                            |
| manage a team                                           |
| manage air quality                                      |
| manage budgets                                          |

|                                                                   |
|-------------------------------------------------------------------|
| manage contracts                                                  |
| manage engineering project                                        |
| manage environmental impact                                       |
| manage timber stocks                                              |
| manipulate wood                                                   |
| meet contract specifications                                      |
| monitor contractor performance                                    |
| monitor electric generators                                       |
| monitor nuclear power plant systems                               |
| monitor production developments                                   |
| monitor radiation levels                                          |
| negotiate with stakeholders                                       |
| operate meteorological instruments                                |
| operate surveying instruments                                     |
| oversee construction project                                      |
| oversee pre-assembly operations                                   |
| oversee quality control                                           |
| perform laboratory tests                                          |
| perform project management                                        |
| perform risk analysis                                             |
| perform sample testing                                            |
| perform surveying calculations                                    |
| plan engineering activities                                       |
| plan product management                                           |
| plan resource allocation                                          |
| prepare geological map sections                                   |
| prepare surveying report                                          |
| prepare technical reports                                         |
| present reports                                                   |
| process collected survey data                                     |
| process customer requests based on the REACH Regulation 1907 2006 |
| promote sustainable energy                                        |
| provide advice to technicians                                     |
| provide information on geological characteristics                 |
| provide information on geothermal heat pumps                      |
| provide information on solar panels                               |
| provide information on wind turbines                              |
| read standard blueprints                                          |
| record survey measurements                                        |
| record test data                                                  |
| report test findings                                              |
| research locations for wind farms                                 |
| resolve equipment malfunctions                                    |
| respond to electrical power contingencies                         |
| respond to nuclear emergencies                                    |

|                                         |
|-----------------------------------------|
| review meteorological forecast data     |
| simulate transport problems             |
| study aerial photos                     |
| study prices of wood products           |
| study traffic flow                      |
| supervise staff                         |
| test safety strategies                  |
| test wind turbine blades                |
| troubleshoot                            |
| use CAD software                        |
| use a computer                          |
| use geographic information systems      |
| use methods of logistical data analysis |
| use software tools for site modelling   |
| use thermal management                  |
| value properties                        |
| wear appropriate protective gear        |
| Future skills                           |
| Essential                               |
| Basic digital skills                    |
| Advanced data analysis                  |
| Mathematical skills                     |
| IoT                                     |
| Big Data                                |
| Business Intelligence                   |
| Adaptability & adapt to change          |
| Continuous learning                     |
| Critical thinking & decision making     |
| Work autonomously                       |
| Active listening                        |
| Basic numeracy and communication        |
| Basic data input and processing         |
| Advanced literacy                       |
| Quantitative and statistical skills     |
| Complex information processing          |
| Complex problem solving                 |
| Problem management                      |
| Risk management                         |
| Environmental awareness                 |
| Energy efficiency                       |
| BIM methodology                         |
| 3D Printing                             |
| Use of new measurement systems: drones  |
| Resource reuse/recycling                |
| Waste management (reduction and reuse)  |
| Product life cycle impact assessment    |

|                                                      |
|------------------------------------------------------|
| Application of new technologies to civil engineering |
| Energy efficiency of buildings and infrastructure.   |
| Risk management related to climate change            |
| Sustainable waste management - Circular Economy      |
| Sustainable resource management                      |
| Project management                                   |
| Optional                                             |
| Cybersecurity                                        |
| Use of complex digital communication tools           |
| Quality procedures related to digital transformation |
| Information Security Management                      |
| Advanced communication skills                        |
| Interpersonal skills and empathy                     |
| Leadership and managing others                       |
| Entrepreneurship and initiative taking               |
| Teaching and training the others                     |
| Process analysis                                     |
| Personal experience                                  |
| Creativity                                           |
| Ergonomics                                           |
